# Supplementary material for: BS-Seeker2: a versatile aligning pipeline for bisulfite sequencing data
Source: Springer Nature journal article supplement (doi:10.1186/1471-2164-14-774), 2013-11-10

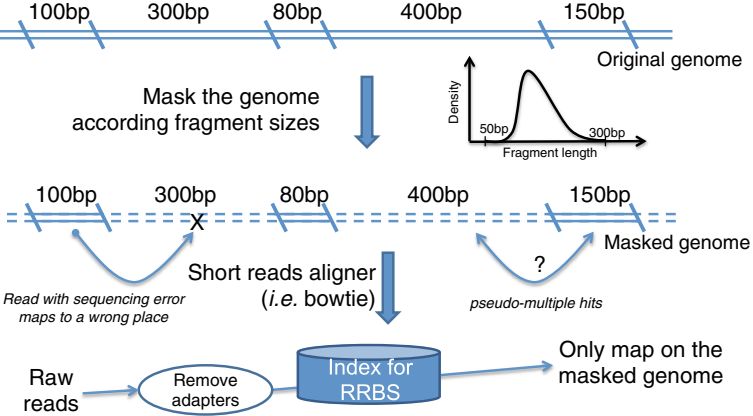

Supplement: 12864_2013_5493_MOESM4_ESM.pdf [file 12864_2013_5493_MOESM4_ESM.pdf]
